# Supplementary material for: Physicochemical properties and mechanism of action of a new copper(ii) pyrazine-based complex with high anticancer activity and selectivity towards cancer cells
Source: Royal Society of Chemistry journal article supplement (doi:10.1039/d4ra06874b), 2024-01-01
Supplement: d4ra06874b1.pdf [file d4ra06874b1.pdf]

Parts of Figure S20 were not present in the original version. This has been updated here.

## Supplementary Materials

# Physicochemical properties and mechanism of action of the new copper(II) pyrazine-based complex with high anticancer activity and selectivity towards cancer cells

Table S1. SC-XRD experimental details for **Cu(L)** compound.

|                                                                            |                                                                  |
|----------------------------------------------------------------------------|------------------------------------------------------------------|
| Chemical formula                                                           | $2(\text{C}_{14}\text{H}_{15}\text{Cl}_2\text{CuN}_5\text{S}_2)$ |
| $M_r$                                                                      | 903.74                                                           |
| Crystal system, space group                                                | Orthorhombic, $Pna2_1$                                           |
| Temperature (K)                                                            | 101                                                              |
| $a, b, c$ (Å)                                                              | 14.7703 (5), 9.2488 (3), 26.0606 (8)                             |
| $V$ (Å <sup>3</sup> )                                                      | 3560.06 (19)                                                     |
| $Z$                                                                        | 4                                                                |
| Radiation type                                                             | Mo $K\alpha$                                                     |
| $\mu$ (mm <sup>-1</sup> )                                                  | 1.77                                                             |
| Crystal size (mm)                                                          | $0.59 \times 0.22 \times 0.02$                                   |
| No. of measured, independent and observed [ $I > 2\sigma(I)$ ] reflections | 28753, 9961, 8915                                                |
| $R_{\text{int}}$                                                           | 0.057                                                            |
| $(\sin \theta/\lambda)_{\text{max}}$ (Å <sup>-1</sup> )                    | 0.748                                                            |
| $R[F^2 > 2\sigma(F^2)], wR(F^2), S$                                        | 0.048, 0.103, 1.04                                               |
| No. of reflections                                                         | 9961                                                             |
| No. of parameters                                                          | 436                                                              |
| No. of restraints                                                          | 1                                                                |
| $\Delta_{\text{max}}, \Delta_{\text{min}}$ (e Å <sup>-3</sup> )            | 0.87, -0.91                                                      |
| Absolute structure                                                         | Refined as an inversion twin                                     |
| Absolute structure parameter                                               | 0.504 (16)                                                       |

Table S2. The sequences of primers used in the gene expression evaluation.

| Gene symbol     | Forward Sequence (5'→3') | Reverse Sequence (5'→3') |
|-----------------|--------------------------|--------------------------|
| <i>CAT</i>      | CCGGGACTACACCCAGATGA     | TCTTGGCGTTCTCCTGATGC     |
| <i>GPX</i>      | CTTCAGGGTGGTATGGCTGT     | TGGCCAGACCTTAATGTTCC     |
| <i>GSR</i>      | TCAGCTCACCACAACCTCTG     | GAGACCAGCCTGACCAACAT     |
| <i>SOD2</i>     | CTTCAGGGTGGTATGGCTGT     | TGGCCAGACCTTAATGTTCC     |
| <i>NF2L2</i>    | AGCTTAGCGTTCATCCGTGT     | TCCAATCATCCGTCAAAACA     |
| <i>ATM</i>      | GCCGCGTTGATACTACTTTG     | GCAGCAGGGTGACAATAAACA    |
| <i>ATR</i>      | AATGGTTGGAGAATGCTGGC     | ACATCACCCTTGGACCAGAG     |
| <i>OGG1</i>     | CCTGTGGGGACCTTATGCTG     | TGTGAATCCCCTCTCCCGAT     |
| <i>PARP</i>     | CCCCACGACTTTGGGATGAA     | AGACTGTAGGCCACCTCGAT     |
| <i>RNA18SN5</i> | GAAACTGCGAATGGCTCATTA    | CACAGTTATCCAAGTGGGAGAGG  |

Parts of Figure S20 were not present in the original version. This has been updated here.

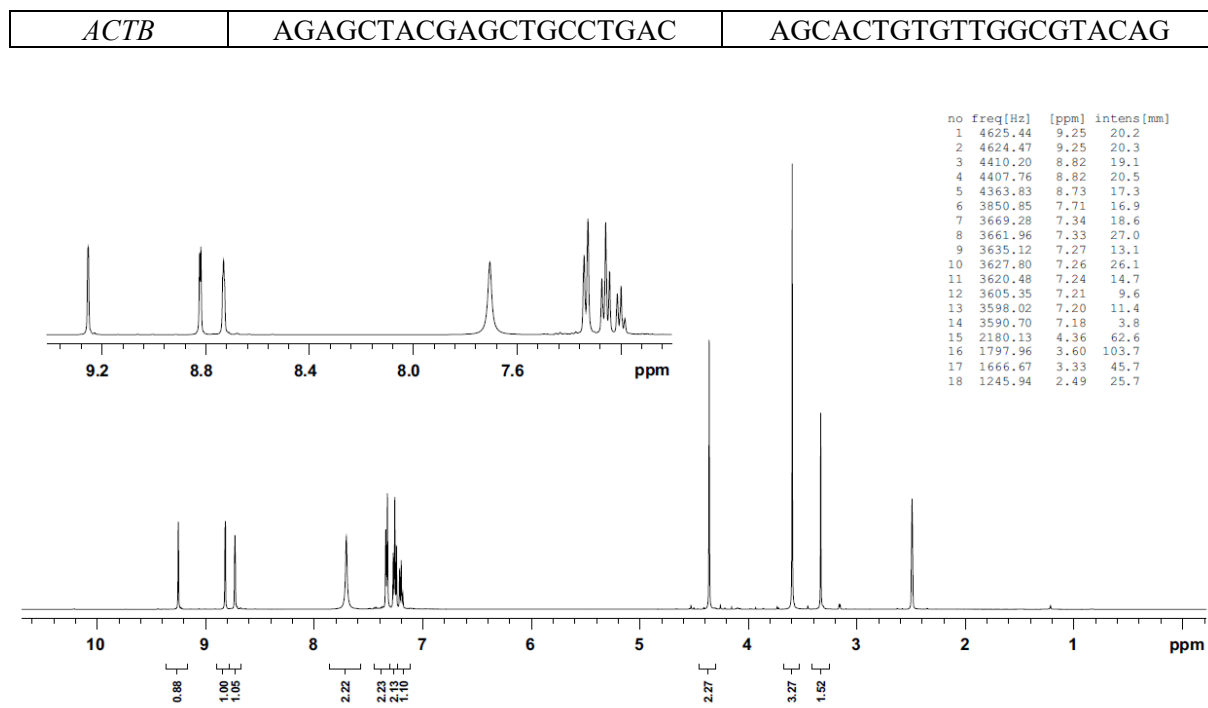

Figure S1. <sup>1</sup>H NMR spectrum of the L ligand.

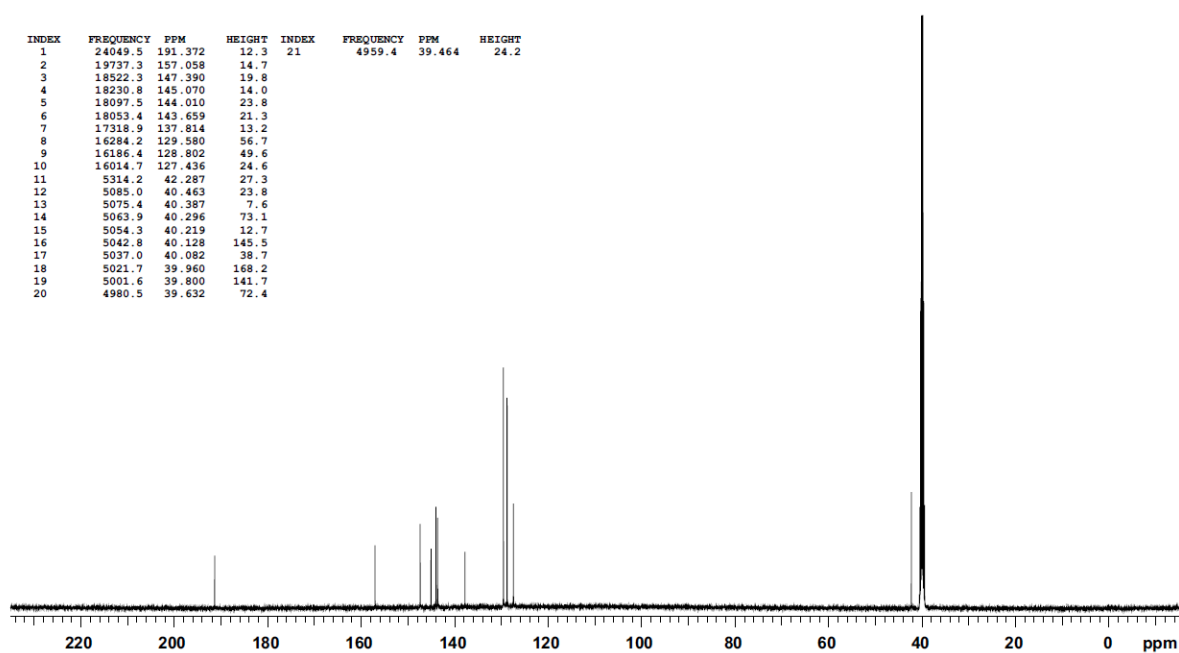

Figure S2. <sup>13</sup>C NMR spectrum of the L ligand.

Parts of Figure S20 were not present in the original version. This has been updated here.

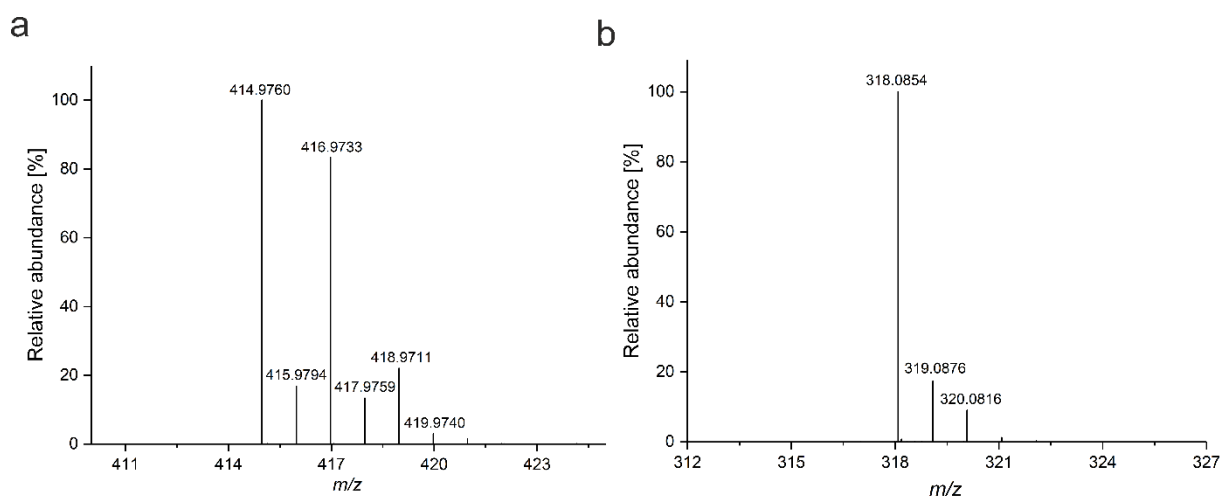

Figure S3. HR-ESI mass spectra obtained for the **Cu(L)** complex (a) and the ligand **L** (b). The experimental  $m/z$  value at 414.9760 (a) corresponds to  $[M-Cl]^+$  (calculated  $m/z$  for  $C_{14}H_{15}N_5S_2CuCl$ : 414.9753). The experimental  $m/z$  value at 318.0854 (b) corresponds to  $[M+H]^+$  (calculated  $m/z$  for  $C_{14}H_{16}N_5S_2$ : 318.0847).

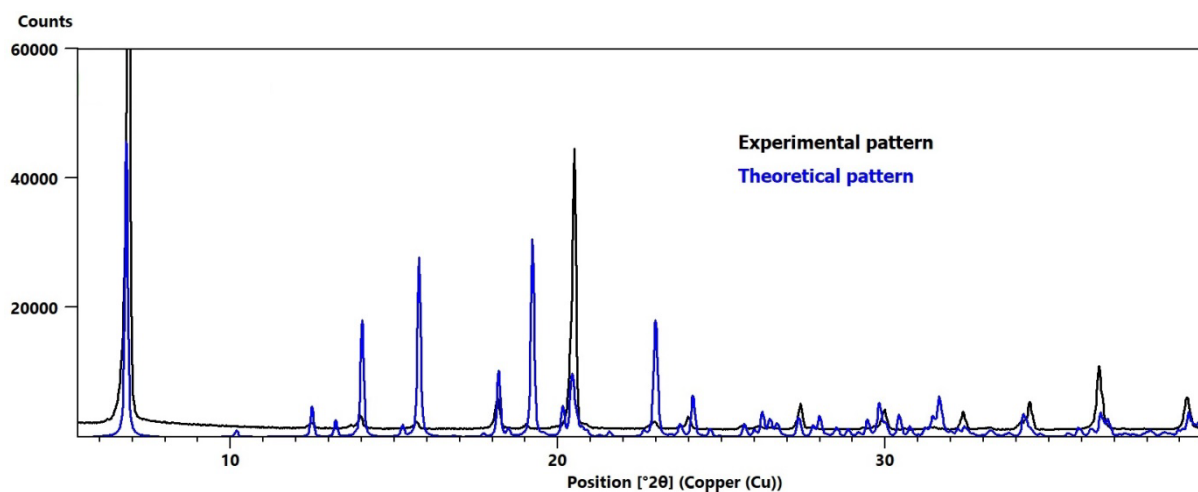

Figure S4. Theoretical and experimental PXRD patterns of the **Cu(L)** compound.

Parts of Figure S20 were not present in the original version. This has been updated here.

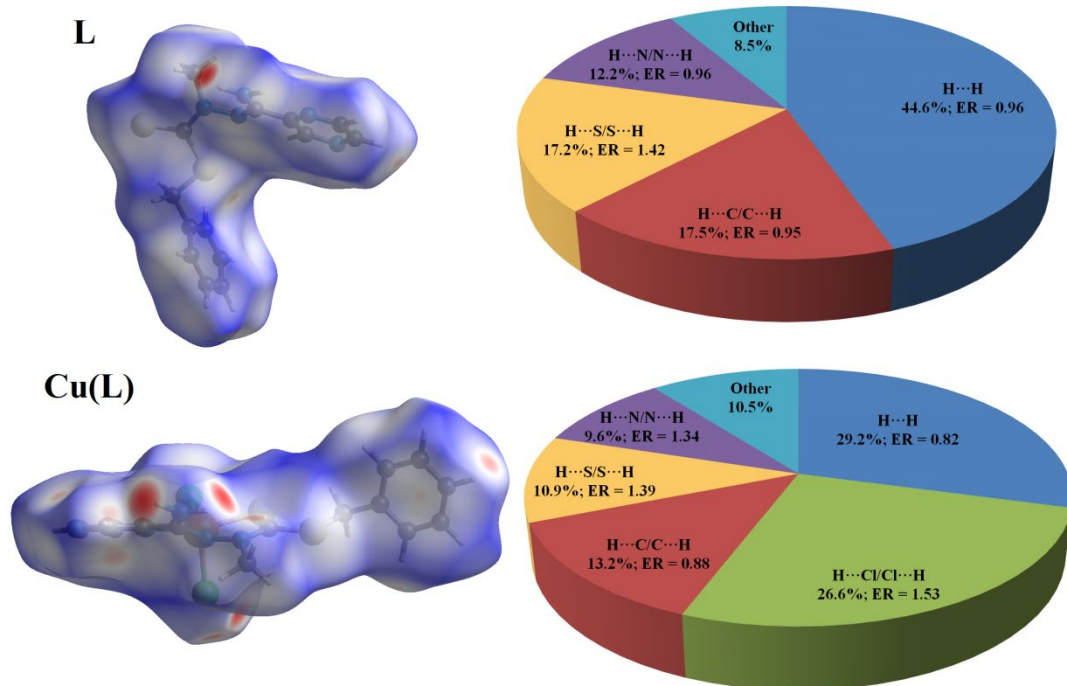

Figure S5. Hirschfeld Surfaces (left) mapped over  $d_{\text{norm}}$  and pie charts representing intermolecular contacts (right) predominant in the studied compounds, **L** and **Cu(L)** with their percentage involvement and Enrichment Ratios.

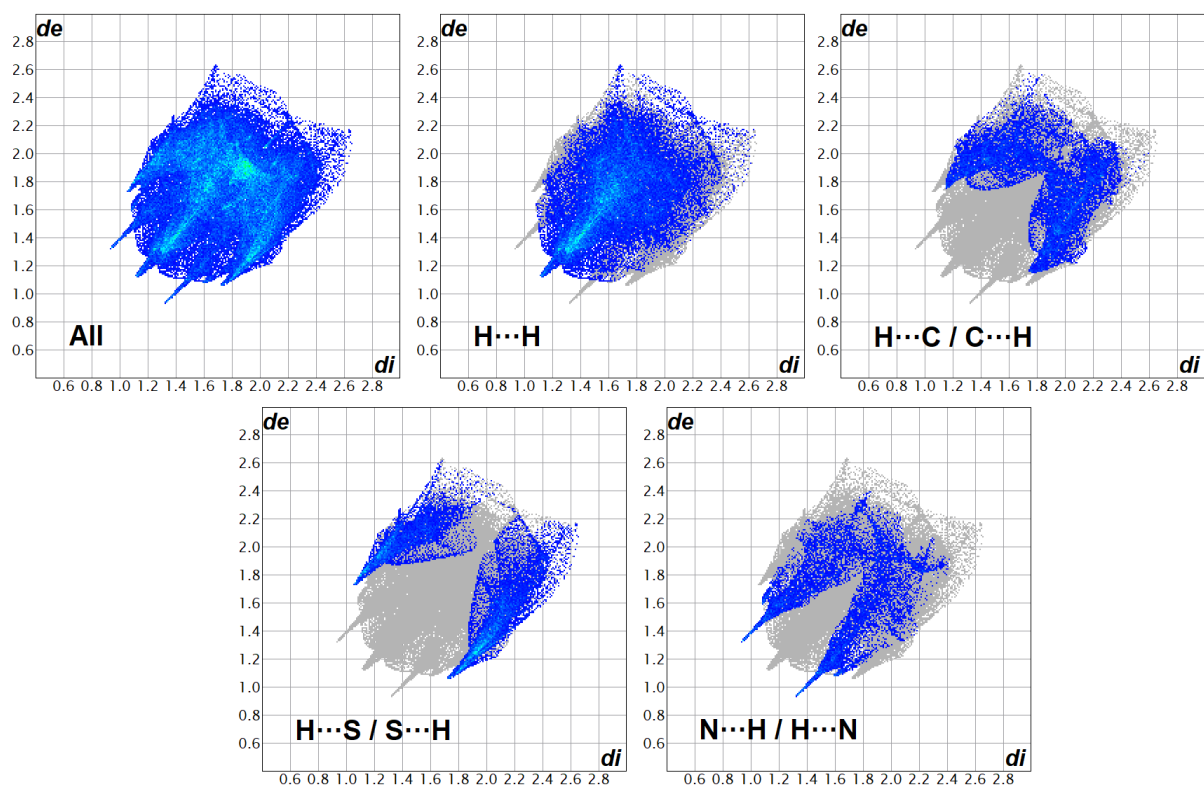

Figure S6. 2D Fingerprint Plots and the predominant contacts in **L** compound.  $d_e$  and  $d_i$  are the distances to the nearest atomic exterior and interior to the surface.

Parts of Figure S20 were not present in the original version. This has been updated here.

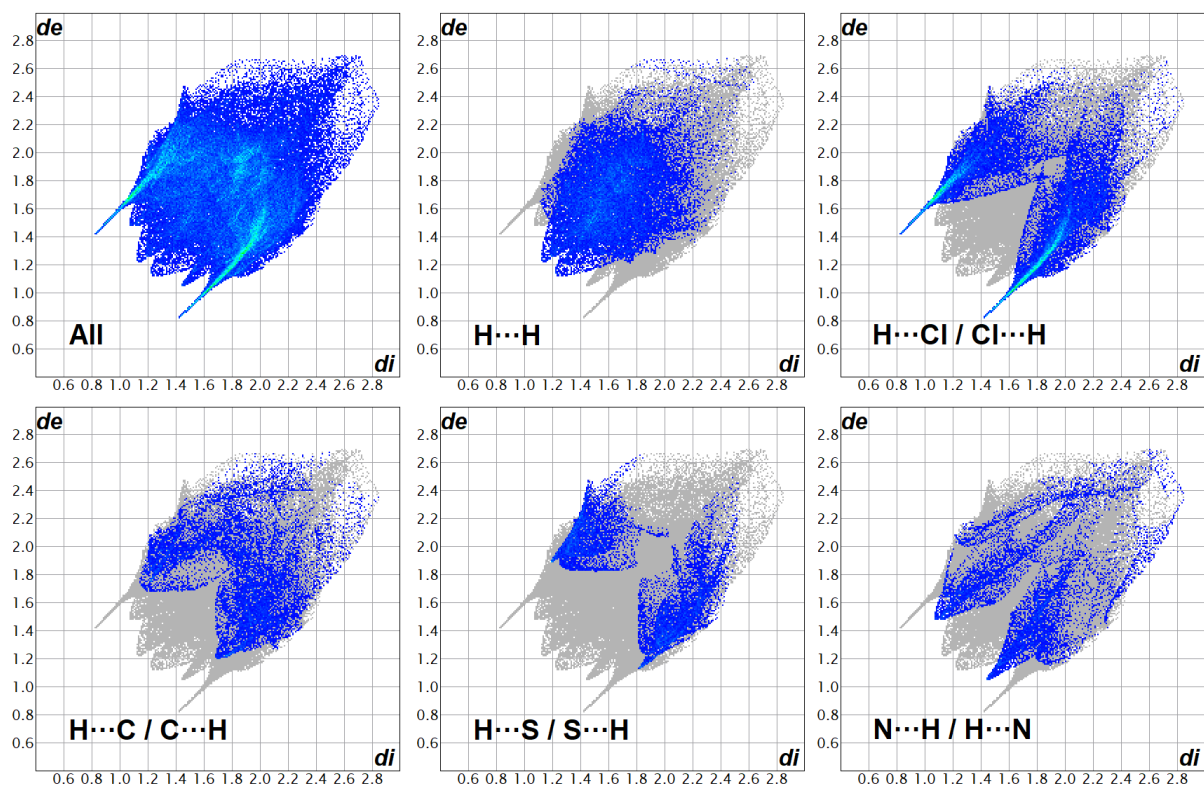

Figure S7. 2D Fingerprint Plots and the predominant contacts in  $\text{Cu(L)}$  compound.  $de$  and  $di$  are the distances to the nearest atomic exterior and interior to the surface.

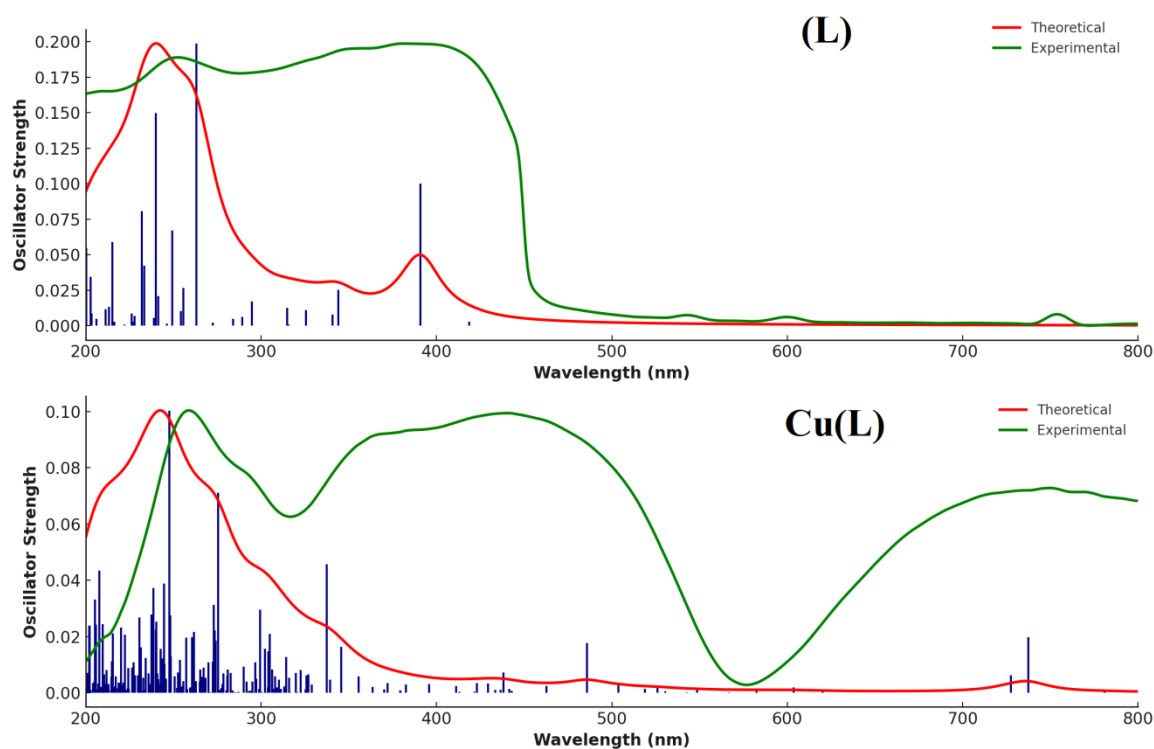

Figure S8. Experimental (green) and calculated (red) UV-Vis spectra of the studied compounds:  $\text{L}$  and  $\text{Cu(L)}$ . Oscillator strengths are represented as vertical navy-blue lines.

Table S3. The most important electronic transitions appearing in the studied compounds and the fluorescence emission maximum of  $\text{L}$  and  $\text{Cu(L)}$ .

Parts of Figure S20 were not present in the original version. This has been updated here.

| Absorption spectroscopy      |            |        |            |       |                                                            |
|------------------------------|------------|--------|------------|-------|------------------------------------------------------------|
| X-ray determined coordinates |            |        |            |       |                                                            |
| Experimental                 |            |        | Calculated |       |                                                            |
| L (nm)                       | Cu(L) (nm) | L (nm) | Cu(L) (nm) | $f$   | Orbital transition                                         |
| 253                          | 258        | 239.9  |            | 0.150 | $\pi \rightarrow \pi^*$                                    |
|                              |            |        | 247.8      | 0.100 | $n/\pi \rightarrow \pi^*$                                  |
|                              |            | 263.1  |            | 0.199 | $n/\pi \rightarrow \pi^*$                                  |
|                              |            |        | 275.4      | 0.071 | $n/\pi/\sigma/d(\text{Cu}) \rightarrow \pi^*/d(\text{Cu})$ |
|                              |            | 370    | 337.5      | 0.046 | $n/\sigma/d(\text{Cu}) \rightarrow \pi^*/d(\text{Cu})$     |
| 382                          |            | 390.7  |            | 0.100 | $n/\pi \rightarrow \pi^*$                                  |
|                              | 442        |        | 485.7      | 0.018 | $n/\sigma/d(\text{Cu}) \rightarrow \pi^*/d(\text{Cu})$     |
|                              | 749        |        | 737.4      | 0.020 | $n/d(\text{Cu}) \rightarrow \pi^*/d(\text{Cu})$            |
| DMSO solution                |            |        |            |       |                                                            |
| Experimental                 |            |        | Calculated |       |                                                            |
|                              | Cu(L) (nm) |        | Cu(L) (nm) | $f$   | Orbital transition                                         |
| 216                          |            |        | 218.1      | 0.097 | $n/d(\text{Cu}) \rightarrow \sigma^*$                      |
|                              |            |        | 243.9      | 0.081 | $\pi/d(\text{Cu}) \rightarrow \pi^*$                       |
| 278                          |            |        | 322.6      | 0.029 | $n/d(\text{Cu}) \rightarrow \pi^*$                         |
| 340                          |            |        | 350.1      | 0.035 | $\pi \rightarrow d(\text{Cu})/\pi^*$                       |
| 540                          |            |        | 468.4      | 0.024 | $n/d(\text{Cu}) \rightarrow \pi^*$                         |
| 701                          |            |        | 605.4      | 0.012 | $n/d(\text{Cu}) \rightarrow \pi^*$                         |
| Fluorescence                 |            |        |            |       |                                                            |
| Compound                     | ExW        | EmW    | Intensity  |       |                                                            |
| <b>L</b>                     | 470        | 481    | 36         |       |                                                            |
| <b>Cu(L)</b>                 | -          | -      | -          |       |                                                            |

Used abbreviations:  $f$  - oscillator strength, d(Cu) — d orbital of a copper cation,  $\sigma$  —  $\sigma$  orbital of the organic ligand, n — non-bonding orbital,  $\pi$  —  $\pi$  orbital of the organic ligand, \* — antibonding orbital.

Parts of Figure S20 were not present in the original version. This has been updated here.

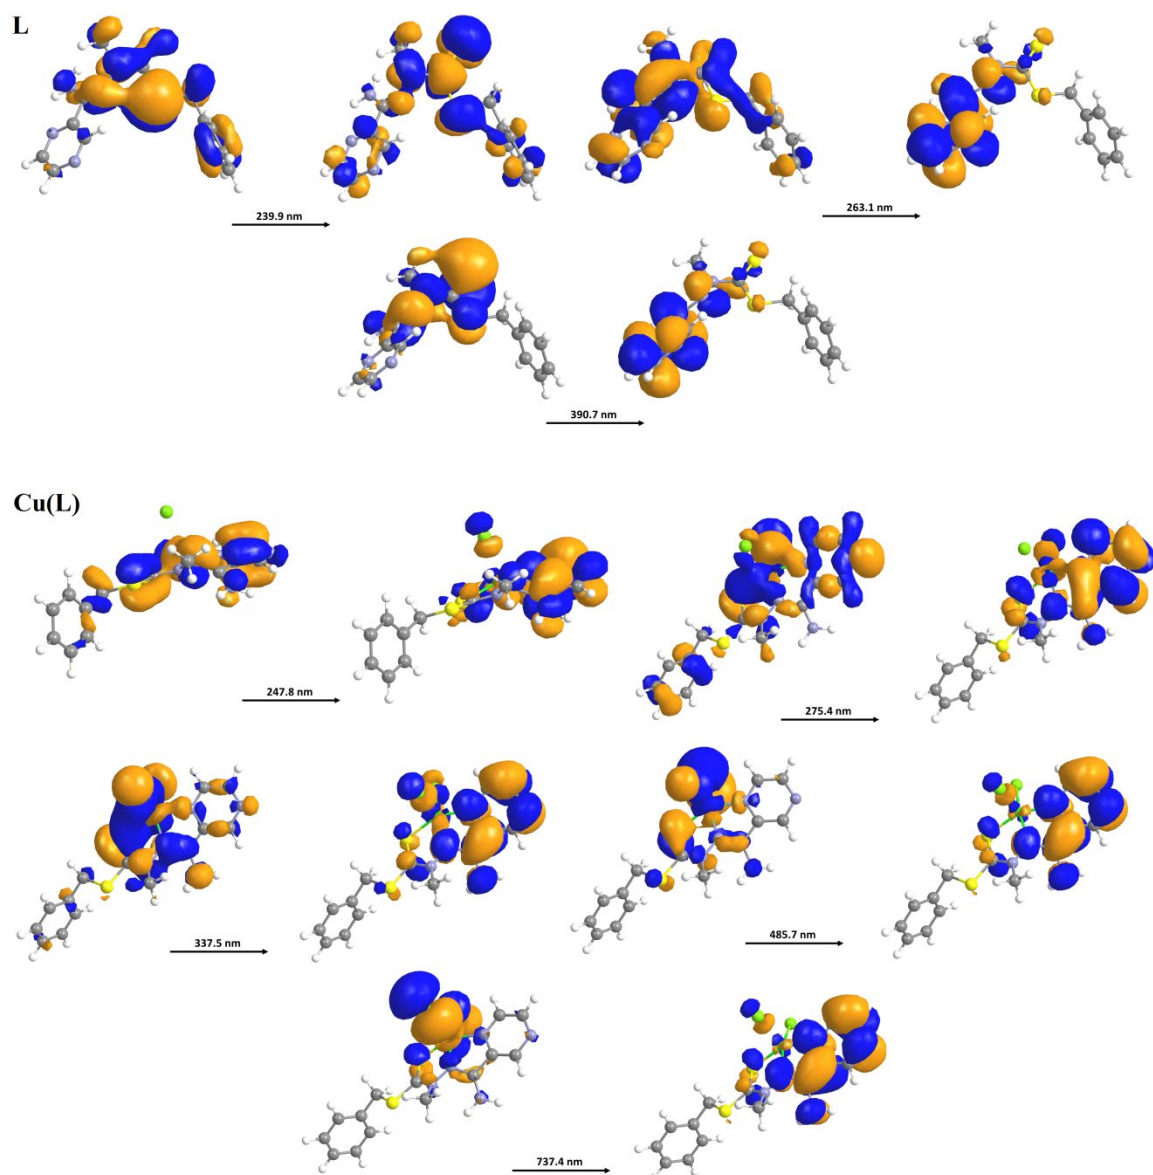

Figure S9. The main molecular orbital transitions in the studied compounds, **L** and **Cu(L)**, which are associated with the solid state absorption spectra of these compounds.

Parts of Figure S20 were not present in the original version. This has been updated here.

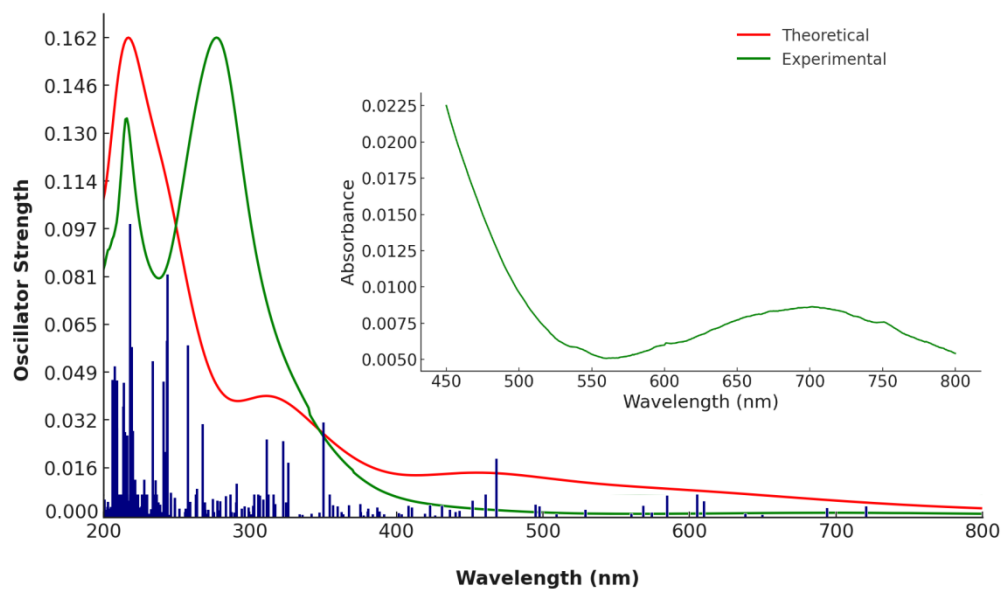

Figure S10. Experimental (green) and calculated (red) UV-Vis spectra of **Cu(L)** in DMSO. Oscillator strengths are represented as vertical navy-blue lines.

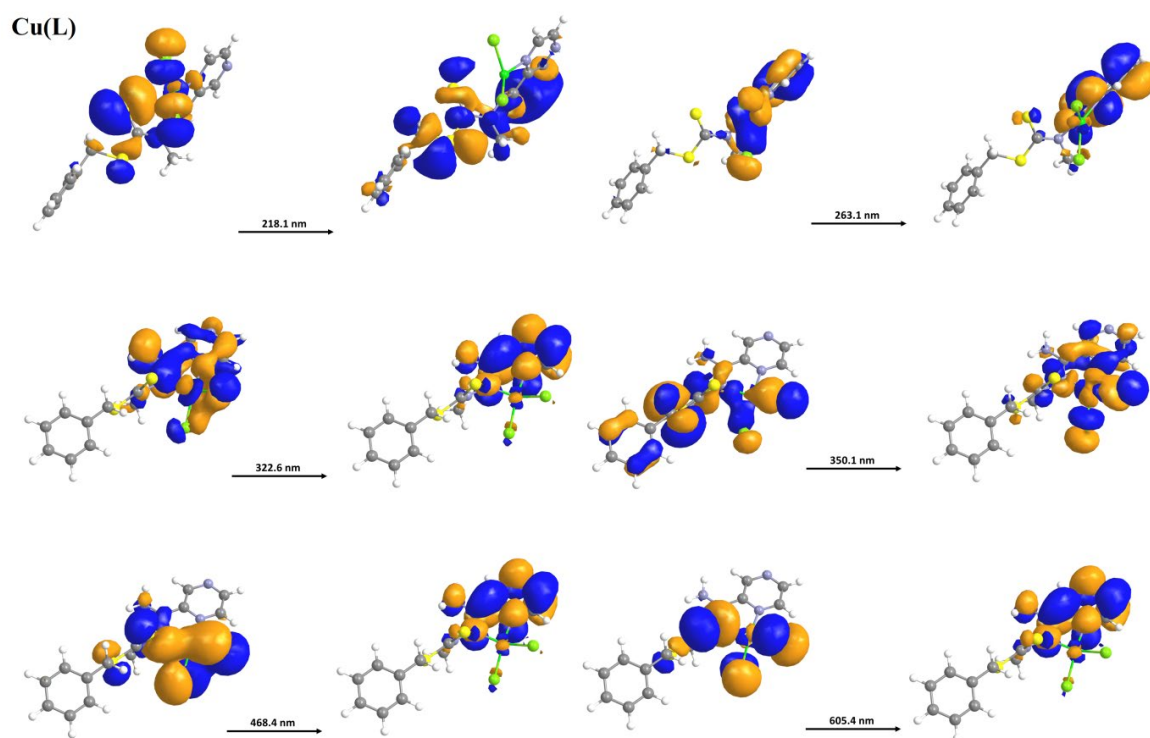

Figure S11. The main molecular orbital transitions for **Cu(L)** in DMSO, which are associated with the solution absorption spectra of this compound.



Parts of Figure S20 were not present in the original version. This has been updated here.

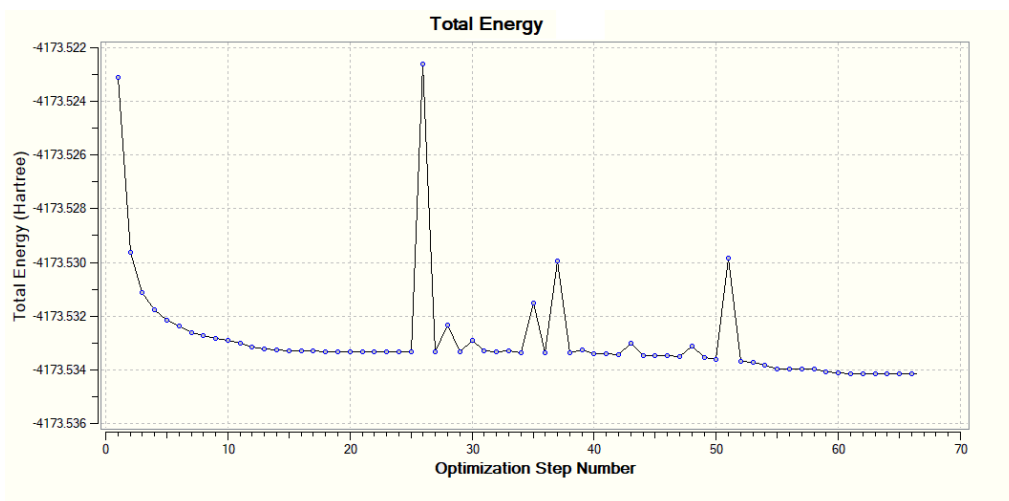

Figure S12. Changes in total energy during optimization of **Cu(L)** complex in water, showing overall decrease in energy, suggesting the system's energetic stability in aqueous environment.

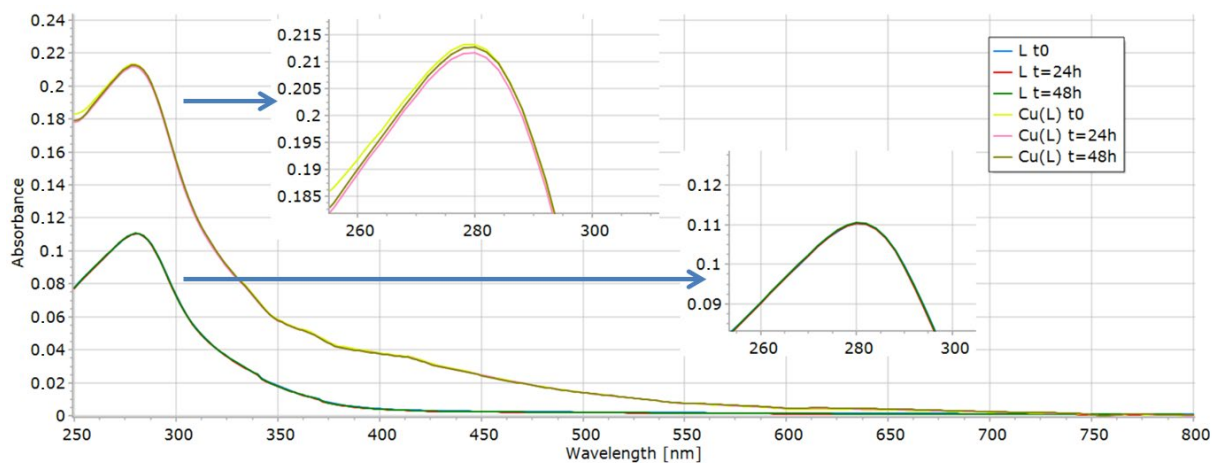

Figure S13. Time-dependent UV-Vis-monitored stability of **L** and **Cu(L)** in DMSO/H<sub>2</sub>O (1:1) mixture (C = 5  $\mu$ M; T = 24°C).

Parts of Figure S20 were not present in the original version. This has been updated here.

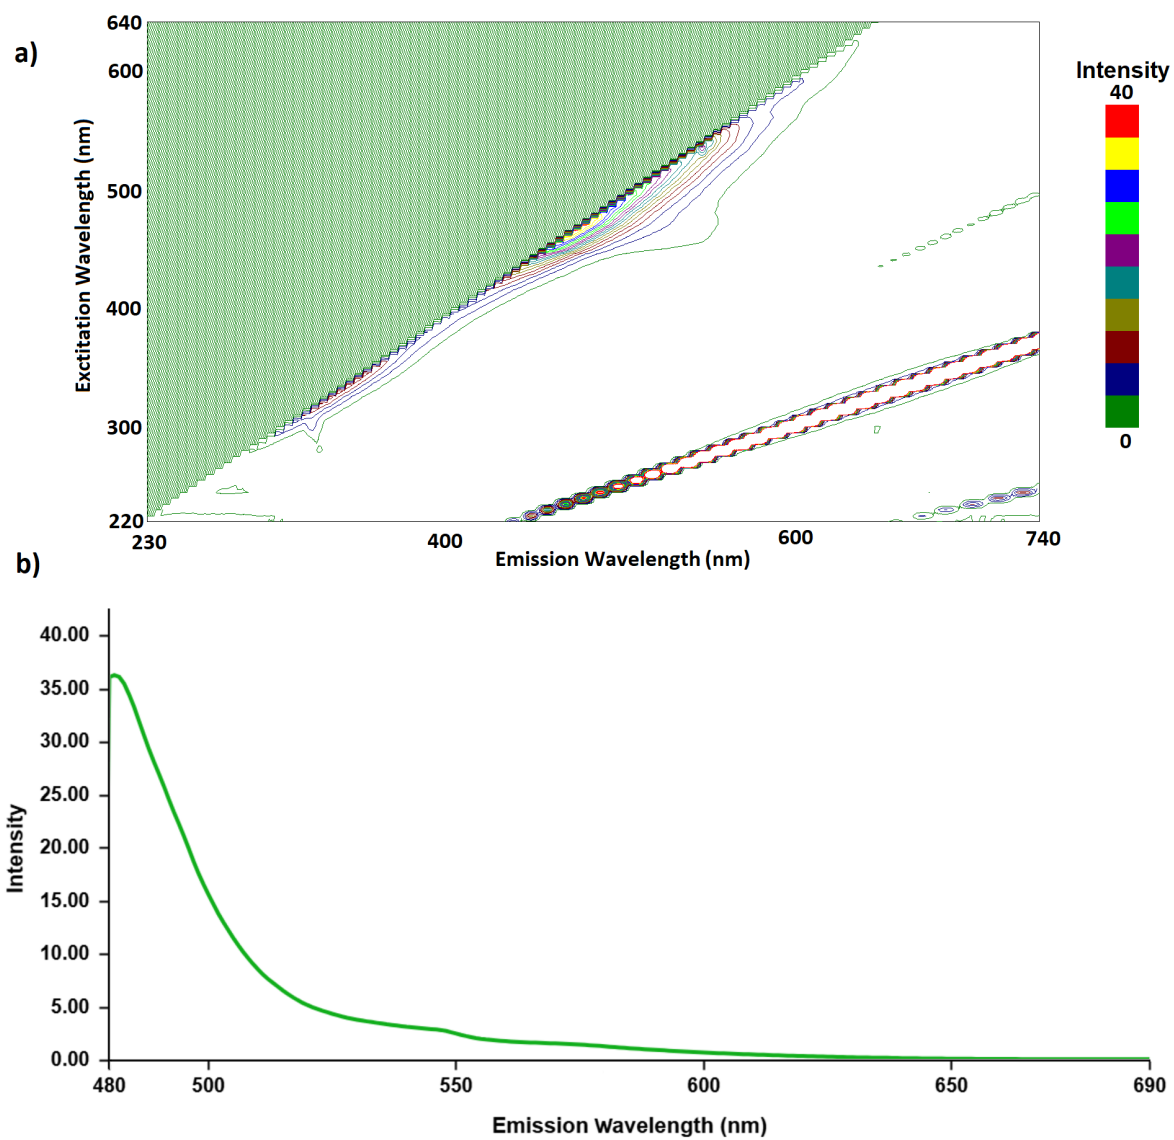

Figure S14. 3D fluorescence spectrum of ligand L (a) and 2D fluorescence spectrum of ligand L (b) obtained as a cross-section of the 3D spectrum at an excitation wavelength of 470 nm.

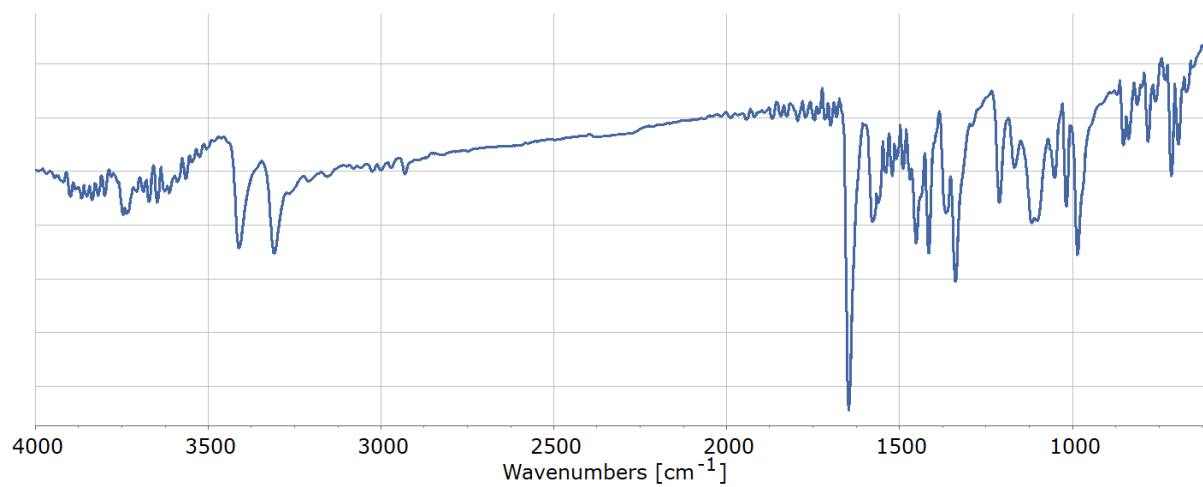

Figure S15. Experimental FTIR spectrum of the L ligand.

Parts of Figure S20 were not present in the original version. This has been updated here.

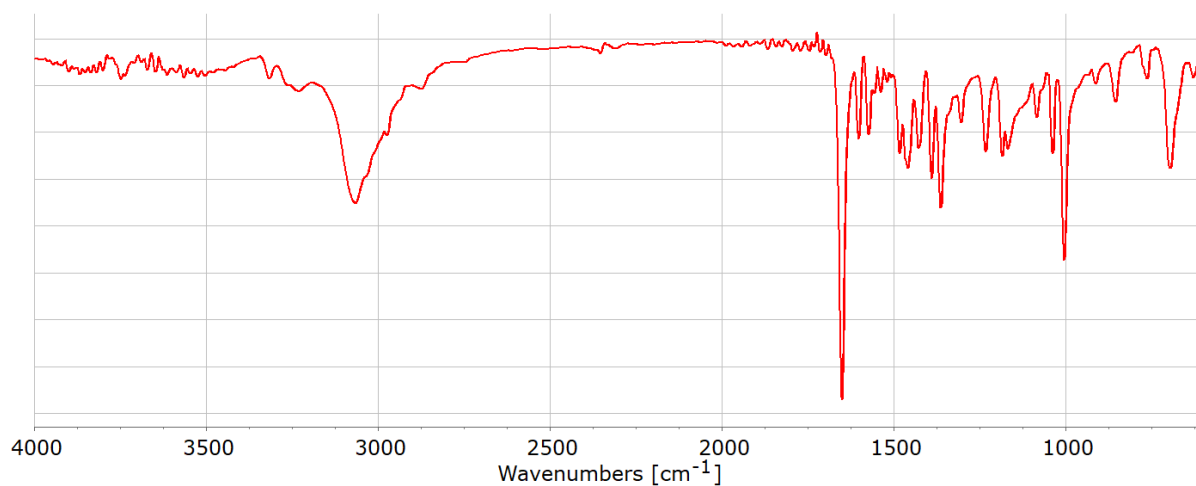

Figure S16. Experimental FTIR spectrum of the **Cu(L)** compound.

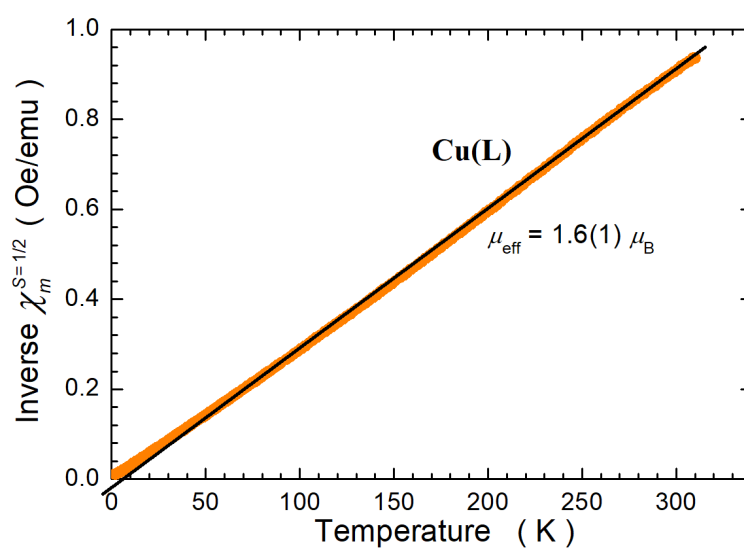

Figure S17. Temperature dependence of the inverse of the molar *spin* susceptibility of Cu ions,  $\chi_m^{S=1/2}$  in the **Cu(L)** coordination compound (orange symbols). The straight black line approximates  $1/T$  paramagnetic dependency. Its slope yields the magnitude of the inverse of the Curie constant, from which the value of the effective spin moment  $\mu_{\text{eff}}$  is calculated and given in the units of Bohr magnetons  $\mu_B$ .

Parts of Figure S20 were not present in the original version. This has been updated here.

| Pa    | Pi    | Cell-line | Description                        | Tissue/Organ                       | Type           | IAP   |
|-------|-------|-----------|------------------------------------|------------------------------------|----------------|-------|
| 0.633 | 0.004 | A-375     | Malignant melanoma                 | Skin                               | Melanoma       | 0.931 |
| 0.591 | 0.025 | HeLa      | Cervical adenocarcinoma            | Cervix                             | Adenocarcinoma | 0.885 |
| 0.558 | 0.004 | NCI-H1299 | Non-small cell lung carcinoma      | Lung                               | Carcinoma      | 0.916 |
| 0.430 | 0.050 | YAPC      | Pancreatic carcinoma               | Pancreas                           | Carcinoma      | 0.817 |
| 0.378 | 0.132 | HCC1937   | Breast Carcinoma                   | Breast                             | Carcinoma      | 0.806 |
| 0.363 | 0.104 | SNU-5     | Gastric Carcinoma                  | Stomach                            | Carcinoma      | 0.828 |
| 0.360 | 0.076 | HGC-27    | Gastric carcinoma                  | Stomach                            | Carcinoma      | 0.830 |
| 0.339 | 0.066 | DU-145    | Prostate carcinoma                 | Prostate                           | Carcinoma      | 0.896 |
| 0.339 | 0.122 | HT1197    | Carcinoma                          | Urinary bladder                    | Carcinoma      | 0.815 |
| 0.330 | 0.236 | SK-LU-1   | Adenocarcinoma                     | Lung                               | Carcinoma      | 0.810 |
| 0.328 | 0.050 | HT        | Lymphoma                           | Haematopoietic and lymphoid tissue | Leukemia       | 0.857 |
| 0.318 | 0.191 | NCI-H358  | Bronchioalveolar Carcinoma         | Lung; Bronchiole                   | Carcinoma      | 0.805 |
| 0.314 | 0.136 | KYSE-520  | Esophageal squamous cell carcinoma | Esophagus                          | Carcinoma      | 0.858 |
| 0.314 | 0.272 | GIST882   | Gastrointestinal stromal tumor     | Intestine                          | Carcinoma      | 0.824 |
| 0.305 | 0.240 | NCI-H441  | Papillary adenocarcinoma           | Lung                               | Adenocarcinoma | 0.813 |

Figure S18. Cancer cell lines the compound L is predicted to be active against. Pa – probably active; Pi – probably inactive; IAP - Invariant Accuracy of Prediction. Only results with a Pa value higher than 0.300 are included.

Parts of Figure S20 were not present in the original version. This has been updated here.

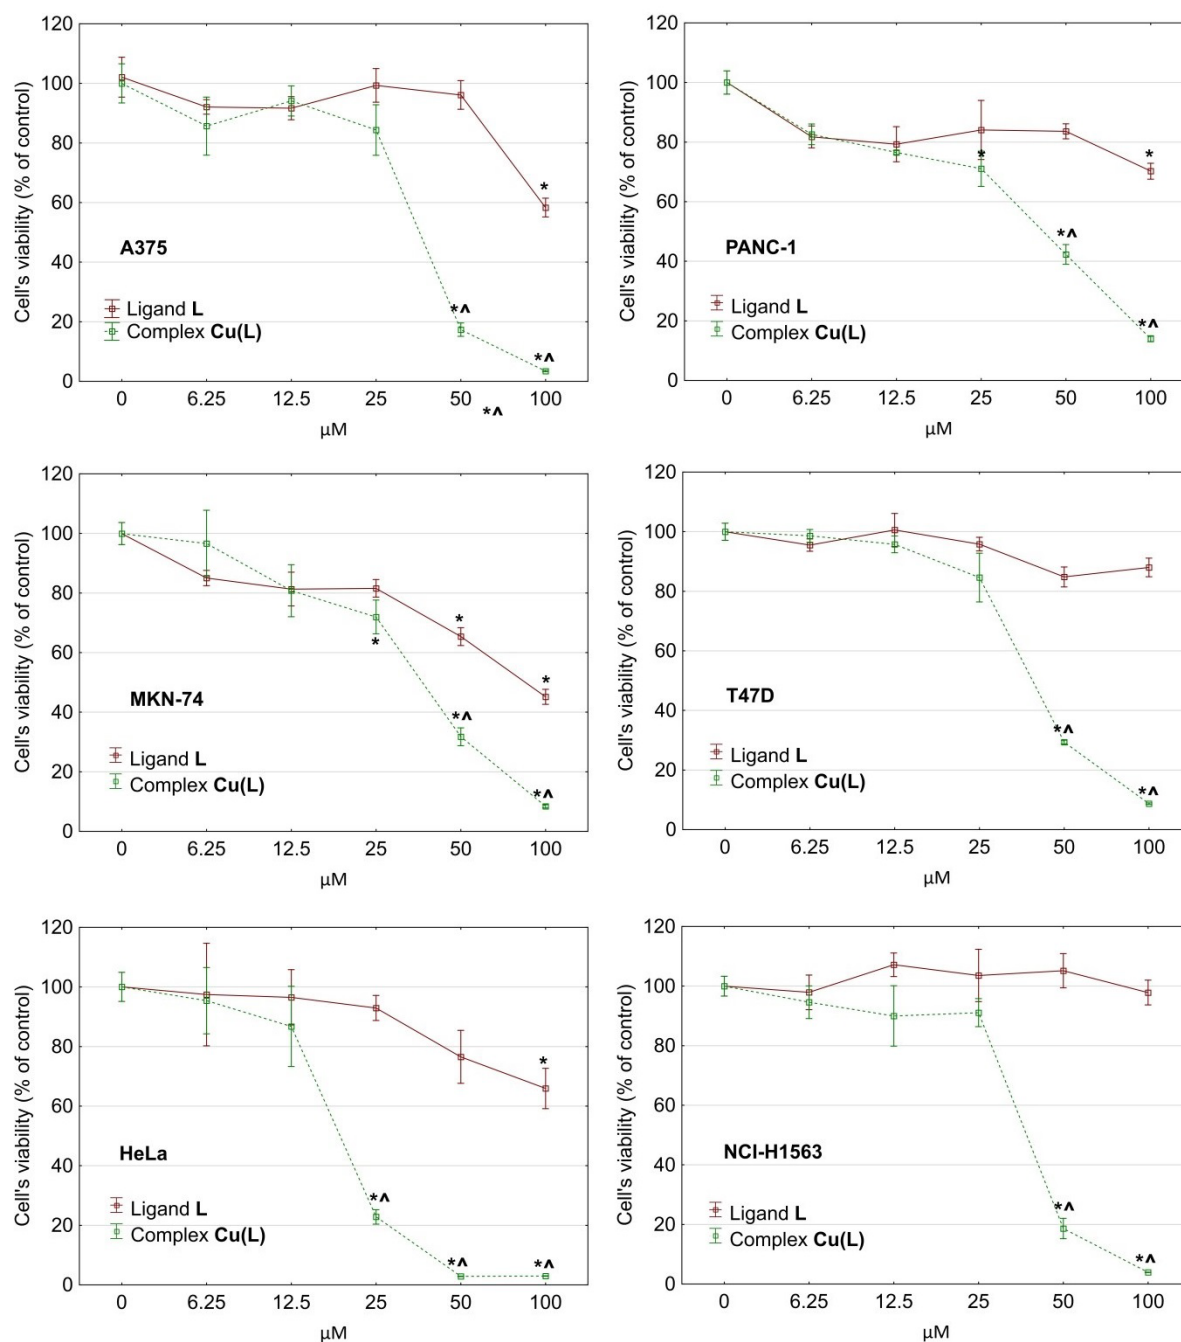

Figure S19. Cytotoxicity of ligand **L** and its complex, **Cu(L)**, based on MTT test results after 48 h incubation. Data are presented as % of control culture viability (mean  $\pm$  SD). \* $p < 0.05$  vs. control, ^  $p < 0.05$  vs. ligand **L**.

Parts of Figure S20 were not present in the original version. This has been updated here.

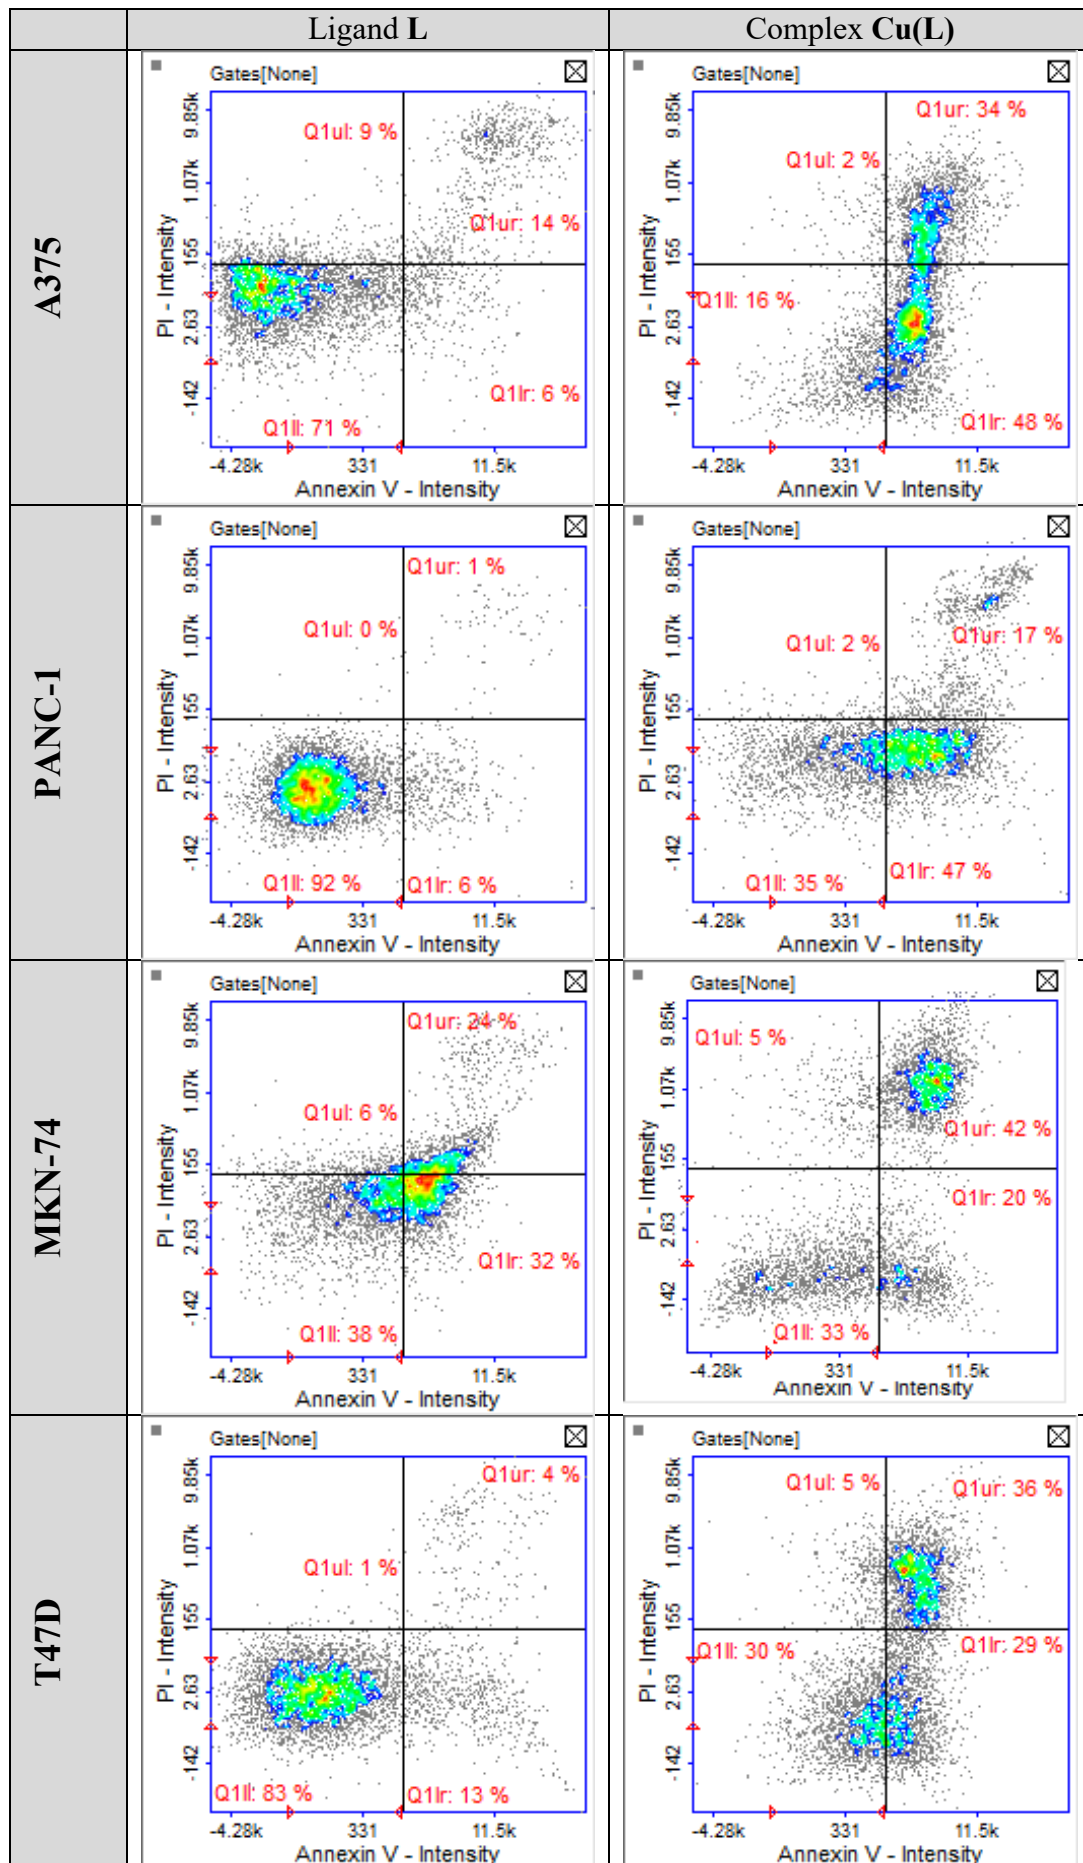

Parts of Figure S20 were not present in the original version. This has been updated here.

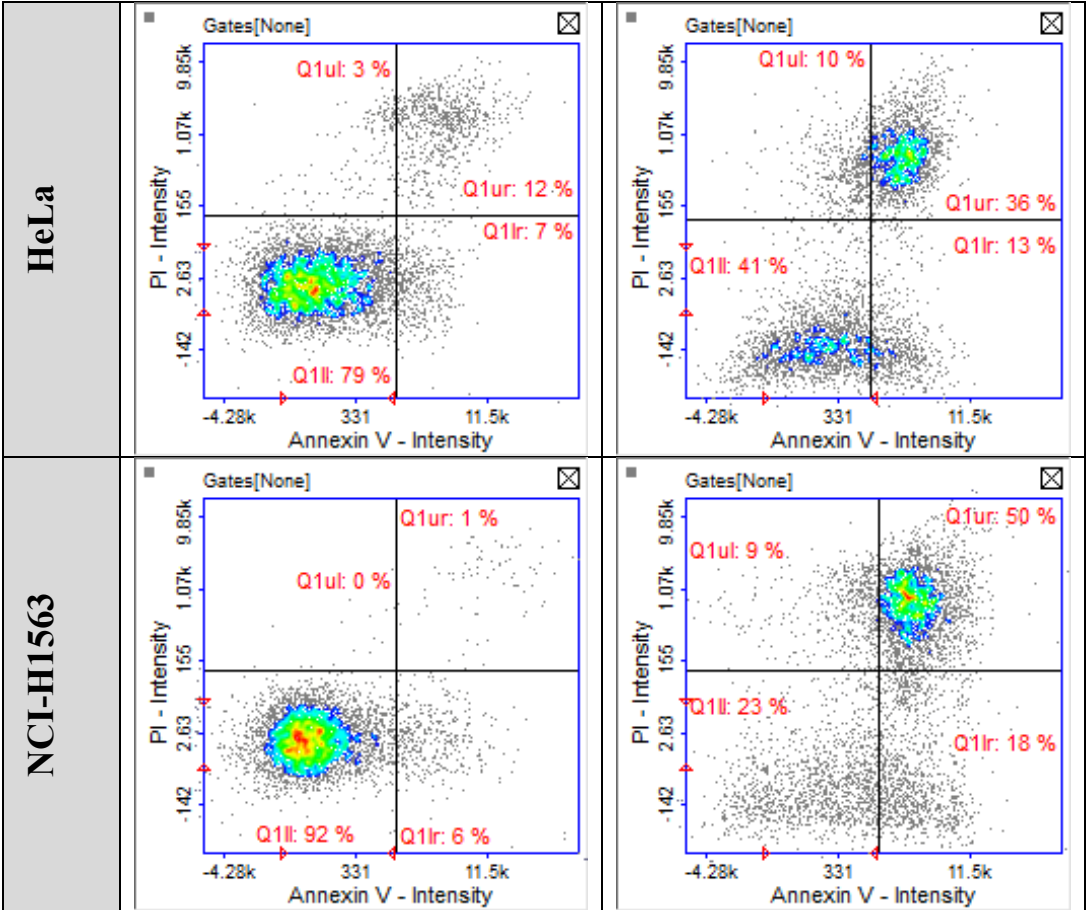

Figure S20. Apoptosis/necrosis detection by image cytometry. The results show one representative experiment. Q1II—live, Q1Ir—early apoptotic, Q1ur—late apoptotic, and Q1uI—necrotic cells.

Parts of Figure S20 were not present in the original version. This has been updated here.

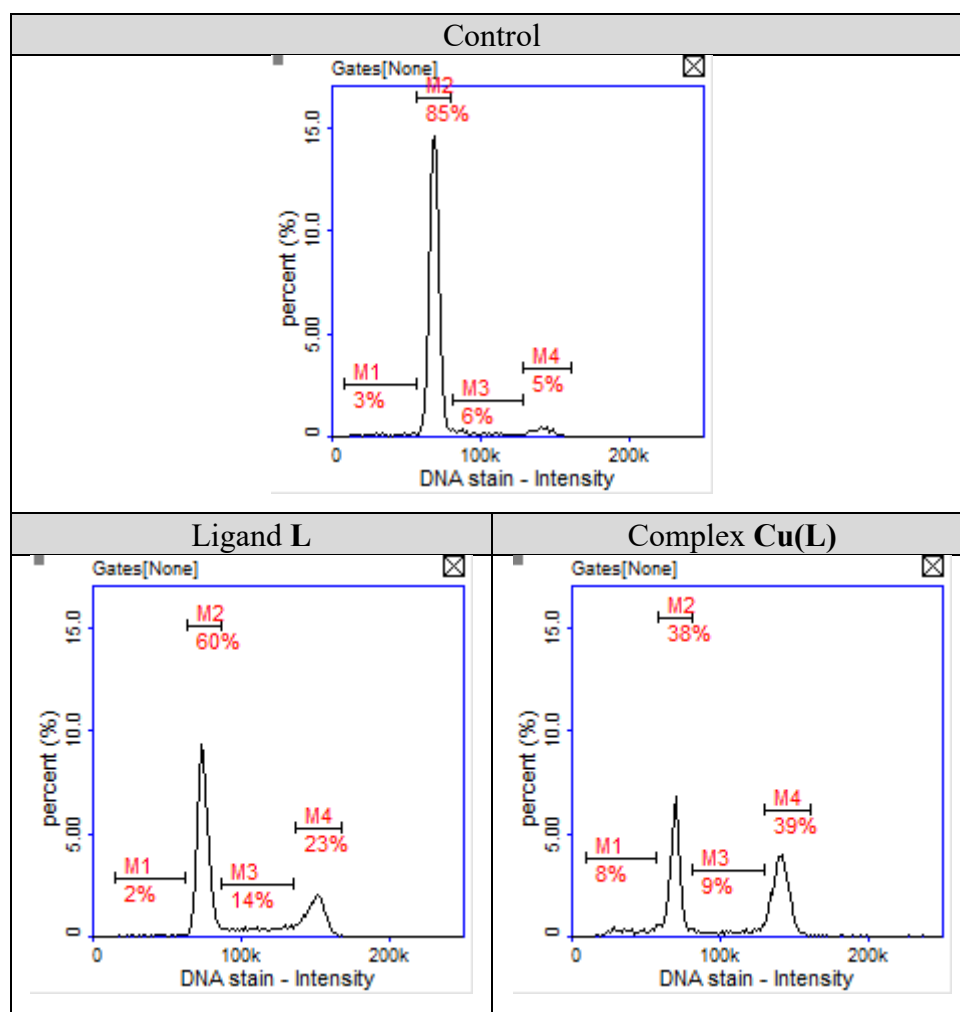

Figure S21. Representative histograms of cell cycle analysis in HeLa cells treated with ligand **L** (100  $\mu\text{M}$ ) and its complex, **Cu(L)** (in concentration corresponding to  $\text{IC}_{50}$  value – 17.50  $\mu\text{M}$ ) or DMSO as a vehicle in control culture for 48 h. M1—subG1, M2—G1, M3—S, M4—G2/M phase.



Parts of Figure S20 were not present in the original version. This has been updated here.

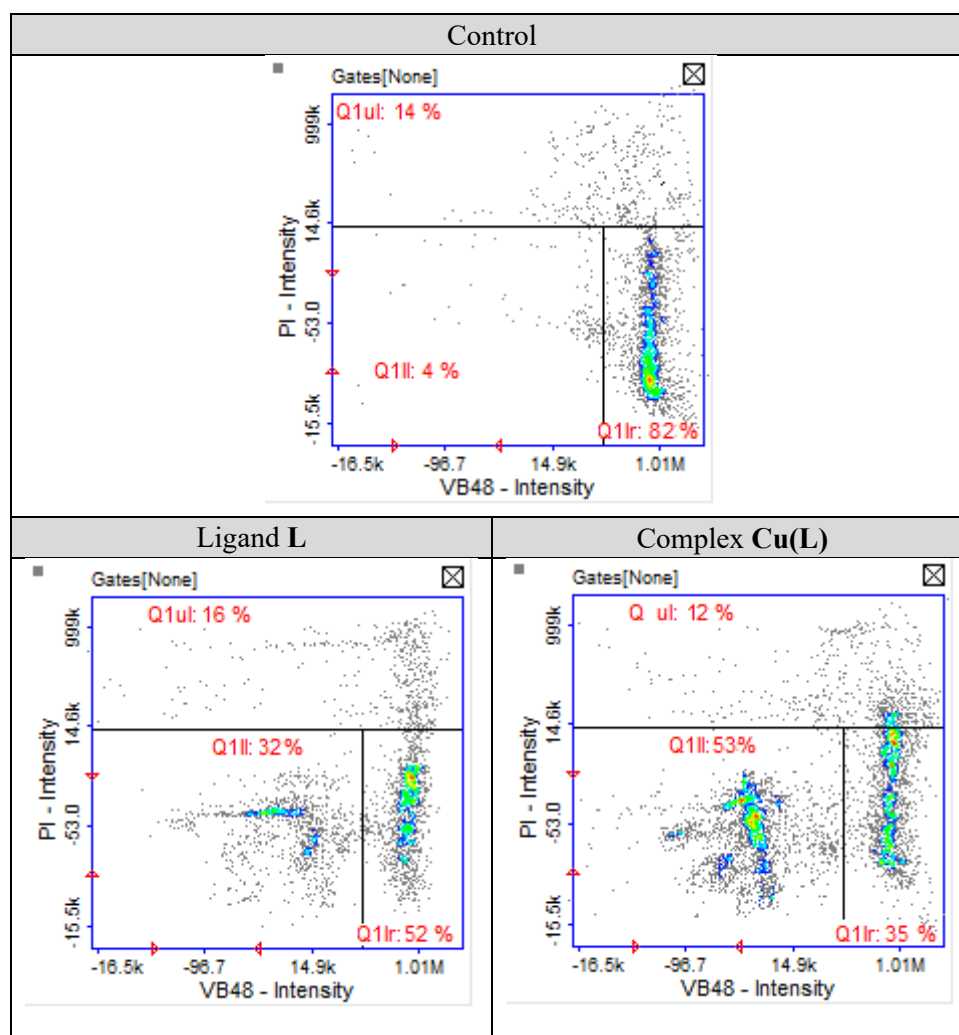

Figure S22. Representative histograms of thiol level distribution in HeLa cells treated with ligand **L** (100  $\mu$ M) and its complex, **Cu(L)** (in concentrations corresponding to  $IC_{50}$  value – 17.50  $\mu$ M) or DMSO as a vehicle in control culture for 48 h. Cells were stained with VitaBright-48<sup>TM</sup> and propidium iodide (PI). Q1Ir – healthy cells, Q1II – subpopulation with decreased thiol levels, Q1ul – dead cells (PI-positive).

Parts of Figure S20 were not present in the original version. This has been updated here.

Table S4. Antimicrobial activity of tested compounds presented as minimal inhibitory concentration (MIC), minimal bactericidal concentration (MBC), and minimal fungicidal concentration (MFC) [mg/L].

| Microorganism                     | Compound   |            |               |            | Reference    |
|-----------------------------------|------------|------------|---------------|------------|--------------|
|                                   | Ligand L   |            | Complex Cu(L) |            | Vancomycin   |
| <b>Gram-positive bacteria</b>     | <b>MIC</b> | <b>MBC</b> | <b>MIC</b>    | <b>MBC</b> | <b>(Van)</b> |
| <i>S. aureus</i> ATCC 25923       | >500       | >500       | 250           | 500        | 0.98         |
| <i>S. aureus</i> ATCC BAA-1707*   | >500       | >500       | 250           | 250        | 0.98         |
| <i>S. epidermidis</i> ATCC 12228  | >500       | >500       | 250           | 500        | 0.98         |
| <i>M. luteus</i> ATCC 10240       | 500        | >500       | 250           | 250        | 0.12         |
| <i>E. faecalis</i> ATCC 29212     | >500       | >500       | 250           | >500       | 1.95         |
| <i>B. cereus</i> ATCC 10876       | >500       | >500       | 250           | 250        | 0.98         |
| <b>Gram-negative bacteria</b>     | <b>MIC</b> | <b>MBC</b> | <b>MIC</b>    | <b>MBC</b> | <b>(Cip)</b> |
| <i>S. typhimurium</i> ATCC 14028  | >500       | >500       | >500          | >500       | 0.061        |
| <i>E. coli</i> ATCC 25922         | >500       | >500       | >500          | >500       | 0.015        |
| <i>P. mirabilis</i> ATCC 12453    | >500       | >500       | >500          | >500       | 0.03         |
| <i>K. pneumoniae</i> ATCC 13883   | >500       | >500       | >500          | >500       | 0.12         |
| <i>P. aeruginosa</i> ATCC 9027    | >500       | >500       | >500          | >500       | 0.49         |
| <b>Yeasts</b>                     | <b>MIC</b> | <b>MFC</b> | <b>MIC</b>    | <b>MFC</b> | <b>(Nys)</b> |
| <i>C. albicans</i> ATCC 102231    | >500       | >500       | 250           | >500       | 0.24         |
| <i>C. parapsilosis</i> ATCC 22019 | >500       | >500       | 62.5          | >500       | 0.24         |
| <i>C. glabrata</i> ATCC 90030     | >500       | >500       | >500          | >500       | 0.48         |

\* Methicillin-resistant *Staphylococcus aureus* (MRSA)
